# Supplementary material
Source: PubMed Central journal article supplement (PMC3271915)
Supplement: 1119763109_pnas.201119763SI.pdf [file 1119763109_pnas.201119763SI.pdf]

# Supporting Information

Gottschalk et al. 10.1073/pnas.1119763109

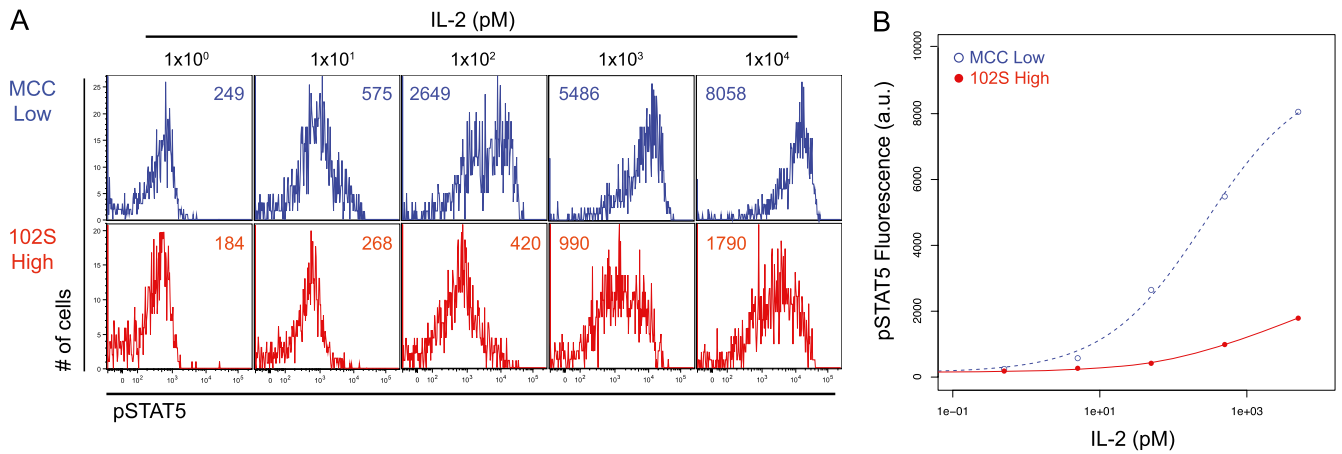

**Fig. S1.** Peptide-induced differential IL-2 sensitivity is not dependent on 5C.C7 production of IL-2. Fourty-eight hours after injection of high-dose (2  $\mu$ g) 102S or low-dose (0.2  $\mu$ g) MCC peptide, adoptively-transferred IL-2<sup>-/-</sup> 5C.C7 T cells were isolated, stripped of cytokine, and treated for 10 min with the indicated dose of IL-2 before staining for pSTAT5. Representative (A) flow plots and (B) dose-response curves.

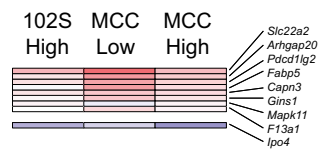

**Fig. S2.** Few TCR-stimulated genes appear to be regulated based on density of pMHC. Affymetrix microarray analysis of mRNA from 5C.C7 sorted after injection of varying doses of MCC or 102S (high, 2  $\mu$ g; low, 0.2  $\mu$ g). As in Fig. 5 A and B, TCR regulated genes were batched based on similar expression, in this case, due to pMHC density.
